# Supplementary material for: Co/Cu-MFF derived mesoporous ternary metal oxide microcubes for enhancing the catalytic activity of the CO oxidation reaction
Source: Royal Society of Chemistry journal article supplement (doi:10.1039/c8ra04081h), 2018-01-01
Supplement: c8ra04081h1.pdf [file c8ra04081h1.pdf]

## Supplementary data

### **Co/Cu-MFFs derived mesoporous ternary metal oxide microcubes for enhancing the catalytic activity of the CO oxidation reaction**

**Huijun Song,<sup>abc</sup> Li Zhang,<sup>\*abcd</sup> Guancheng Xu,<sup>abc</sup> Chi Zhang,<sup>abc</sup> Xin Ma,<sup>abc</sup> Lu  
Zhang,<sup>abc</sup> Dianzeng Jia<sup>\*abc</sup>**

<sup>a</sup> Key Laboratory of Energy Materials Chemistry (Xinjiang University), Ministry of Education, Urumqi, Xinjiang, 830046, P. R. China. E-mail: zhanglixju@163.com, jdz0991@gmail.com; Fax: +86-991-8580586; Tel: +86-991-8580586.

<sup>b</sup> Key Laboratory of Advanced Functional Materials, Autonomous Region, Urumqi, Xinjiang, 830046, P. R. China.

<sup>c</sup> Institute of Applied Chemistry, Urumqi, Xinjiang, 830046, P. R. China.

<sup>d</sup> Physics and Chemistry Detecting Center, Xinjiang University, Urumqi, Xinjiang, 830046, P. R. China.

\*Corresponding author. E-mail: zhanglixju@163.com, jdz0991@gmail.com. Tel./Fax: +86-991-8580586

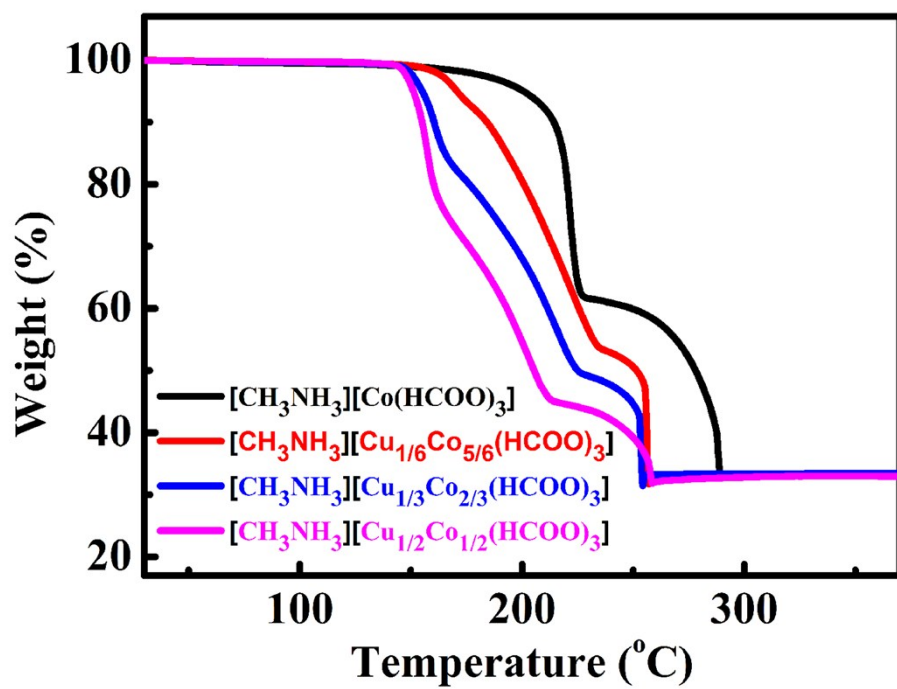

Fig. S1 TGA curves of as-prepared precursors under air flow.

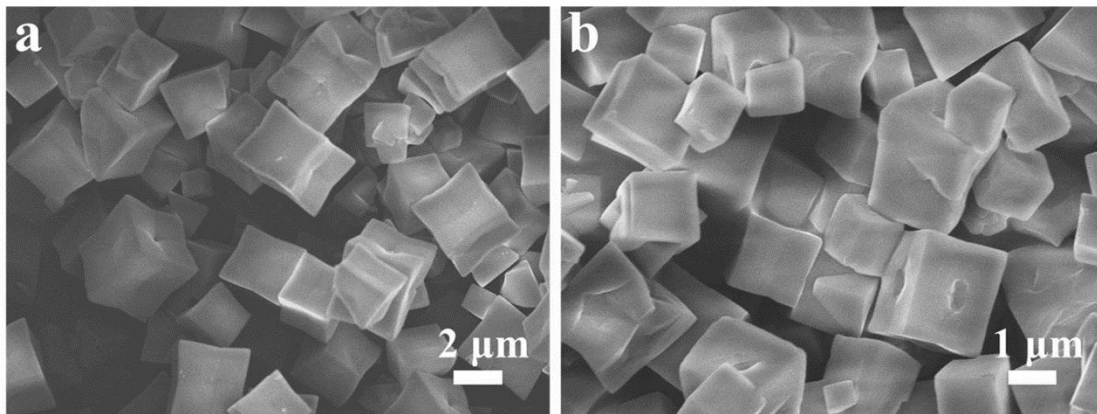

**Fig. S2** SEM images of  $[\text{CH}_3\text{NH}_3][\text{Co}(\text{HCOO})_3]$  (a) and  $[\text{CH}_3\text{NH}_3][\text{Cu}_{1/3}\text{Co}_{2/3}(\text{HCOO})_3]$  (b).

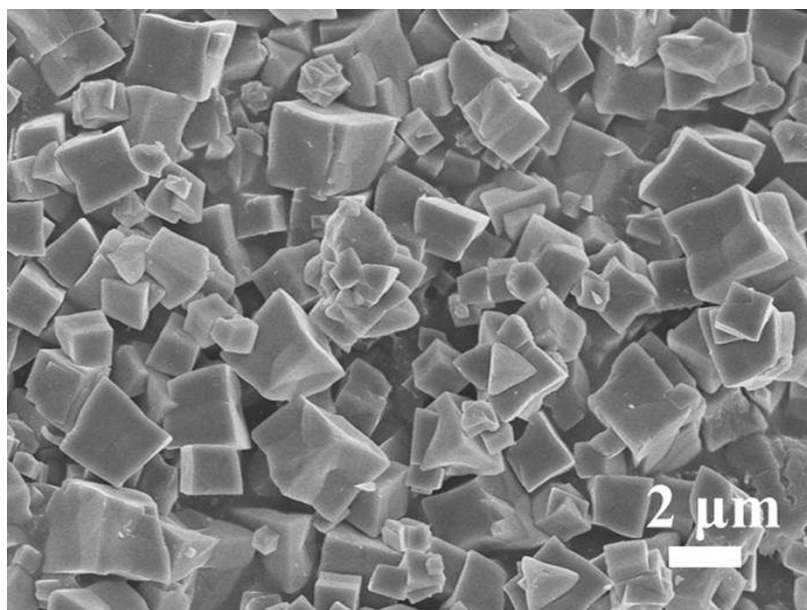

**Fig. S3** SEM images of [CH<sub>3</sub>NH<sub>3</sub>][Co(HCOO)<sub>3</sub>] prepared in the absence of PVP-K30.

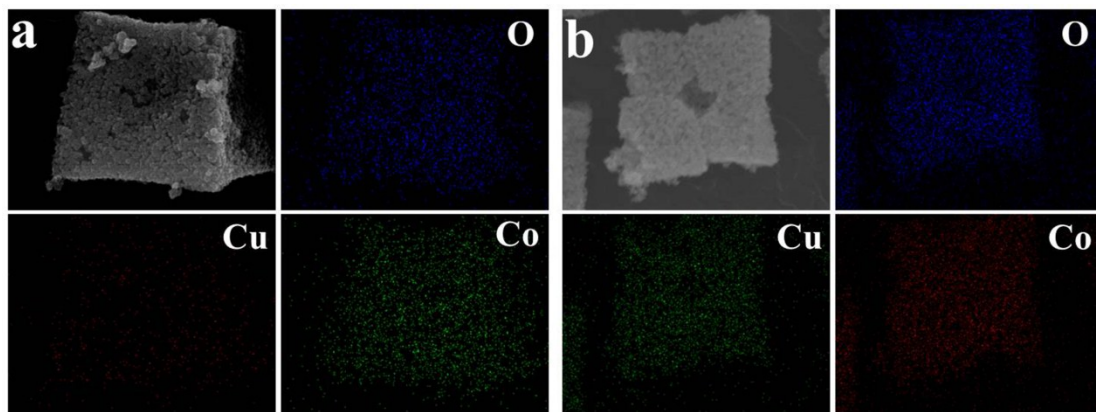

**Fig. S4** SEM–EDX mapping images of  $\text{Cu}_{0.5}\text{Co}_{2.5}\text{O}_4$  (a) and  $\text{Cu}_{1.5}\text{Co}_{1.5}\text{O}_4$  (b).

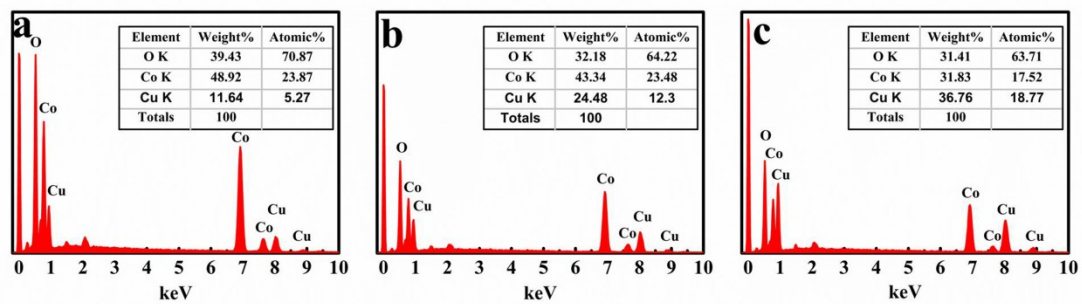

**Fig. S5** EDX spectrum of  $\text{Cu}_{0.5}\text{Co}_{2.5}\text{O}_4$  (a),  $\text{CuCo}_2\text{O}_4$  (b) and  $\text{Cu}_{1.5}\text{Co}_{1.5}\text{O}_4$  (c).

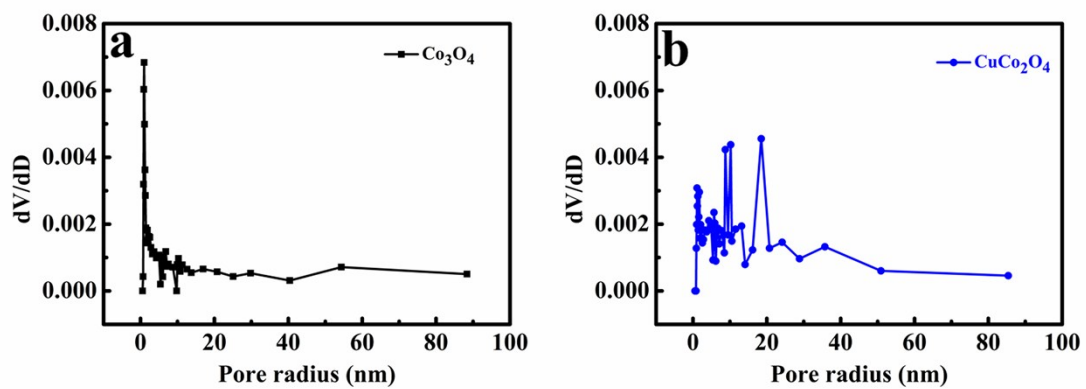

Fig. S6 Barrett-Joyner-Halenda (BJH) pore size distribution plots of  $\text{Co}_3\text{O}_4$  (a) and  $\text{CuCo}_2\text{O}_4$  (b)

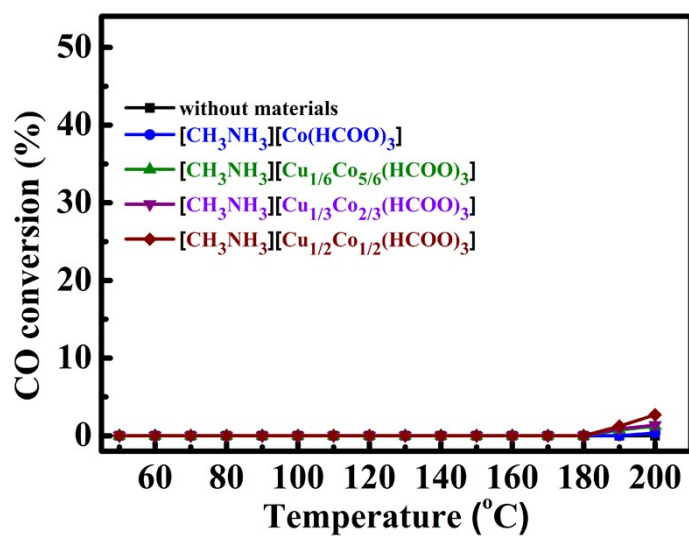

**Fig. S7** CO oxidation conversions of without materials and with 50 mg of precursors performed under different temperatures.



**Table S1** The measured Cu/Co atomic ratio of  $\text{Cu}_x\text{Co}_{3-x}\text{O}_4$  by SEM-EDX, ICP and the calculated Cu/Co atomic ratio in the preparation of precursors.

| Sample                                     | Preparations of precursors                           |                                                      |                    | Cu/Co atomic ratio measured by |       |
|--------------------------------------------|------------------------------------------------------|------------------------------------------------------|--------------------|--------------------------------|-------|
|                                            | $\text{Co}(\text{NO}_3)_2 \cdot 6\text{H}_2\text{O}$ | $\text{Cu}(\text{NO}_3)_2 \cdot 3\text{H}_2\text{O}$ | Calculated         | EDX                            | ICP   |
|                                            | (mmol)                                               | (mmol)                                               | Cu/Co atomic ratio |                                |       |
| $\text{Co}_3\text{O}_4$                    | 1                                                    | 0                                                    | 0                  | 0                              | 0     |
| $\text{Cu}_{0.5}\text{Co}_{2.5}\text{O}_4$ | 5/6                                                  | 1/6                                                  | 0.2                | 0.22                           | 0.235 |
| $\text{CuCo}_2\text{O}_4$                  | 2/3                                                  | 1/3                                                  | 0.5                | 0.52                           | 0.574 |
| $\text{Cu}_{1.5}\text{Co}_{1.5}\text{O}_4$ | 1/2                                                  | 1/2                                                  | 1                  | 1.07                           | 1.147 |

**Table S2** The activity of transition metal oxides as catalysts for CO oxidation reported in this work and other reference.

---

| Catalyst                                          | The temperature of full CO conversion | Ref.            |
|---------------------------------------------------|---------------------------------------|-----------------|
| $\text{Co}_3\text{O}_4$                           | 170 °C                                | Zhang et al.[1] |
| $\text{Cu}/\text{CuO}_x/\text{C}$                 | 155 °C                                | Zhang et al.[2] |
| $\text{Co}_3\text{O}_4\text{-Cu}_2$ (Cu/Co = 1/4) | 120 °C                                | Zhou et al.[3]  |
| $\alpha\text{-Fe}_2\text{O}_3$                    | 255 °C                                | Cui et al.[4]   |
| $\text{Co}_3\text{O}_4$                           | 140 °C                                | This work       |
| $\text{CuCo}_2\text{O}_4$                         | 120 °C                                | This work       |

---

**Table S3** Specific surface area and  $\text{Co}^{2+}/\text{Co}^{3+}$  atomic ratio of pure  $\text{Co}_3\text{O}_4$  reported in this work and reference.

| Sample                           | Specific surface area ( $\text{m}^2 \text{g}^{-1}$ ) | $\text{Co}^{2+}/\text{Co}^{3+}$ atomic ratio | Ref.            |
|----------------------------------|------------------------------------------------------|----------------------------------------------|-----------------|
| $\text{Co}_3\text{O}_4$ nanocube | 6.37                                                 | 1.05                                         | Zhang et al.[1] |
| $\text{Co}_3\text{O}_4$ nanocube | 9.37                                                 | 1.47                                         | Zhang et al.[1] |
| $\text{Co}_3\text{O}_4$ nanocube | 25.59                                                | 0.627                                        | This work       |

## References

- [1] C. Zhang, L. Zhang, G.-C. Xu, X. Ma, Y.-H. Li, C.-Y. Zhang, D.-Z. Jia, *New J. Chem.*, 2017, 41,1631-1636.
- [2] R. Zhang, L. Hu, S. Bao, R. Li, L. Gao, R. Li, Q. Chen, *J. Mater. Chem. A*, 2016, 4, 8412-8420.
- [3] M. Zhou, L. Cai, M. Bajdich, M. Garcia-Melchor, H. Li, J. He, J. Wilcox, W. Wu, A. Vojvodic, X. Zheng, *ACS Catal.*, 2015, 5, 4485-4491.
- [4] L. Cui, D. Zhao, Y. Yang, Y. Wang, X. Zhang, *J. Solid State Chem.*, 2017, 247, 168-172.
